# Supplementary material for: An Anti-VEGF-B Antibody Reduces Abnormal Tumor Vasculature and Enhances the Effects of Chemotherapy
Source: MDPI journal article supplement (doi:10.3390/cancers16101902), 2024-05-16
Supplement: s1 [file s1]

## Supplementary Information

### An Anti-VEGF-B antibody reduces abnormal tumor vasculature and enhances effects of chemotherapy

Peter W. Janes<sup>1,2\*</sup>, Adam C. Parslow<sup>1,2\*</sup>, Diana Cao<sup>1</sup>, Angela Rigopoulos<sup>1</sup>, Fook-Thean Lee<sup>1</sup>, Sylvia J. Gong<sup>3,4</sup>, Glenn A. Cartwright<sup>1</sup>, Ingrid J. G. Burvenich<sup>1,2</sup>, Ulf Eriksson<sup>5</sup>, Terrance G. Johns<sup>6,7</sup>, Fiona E. Scott<sup>1</sup>, and Andrew M. Scott<sup>1,2,4,8</sup>

<sup>1</sup>Tumour Targeting Program, Ludwig Institute for Cancer Research and Olivia Newton-John Cancer Research Institute, Melbourne, Australia; <sup>2</sup>School of Cancer Medicine, La Trobe University, Melbourne, Australia; <sup>3</sup>School of Computing, Engineering and Mathematical Sciences, La Trobe University, Melbourne, Australia; <sup>4</sup>Department of Molecular Imaging and Therapy, Austin Health, Melbourne, Australia; <sup>5</sup>Division of Vascular Biology, Department of Medical Biochemistry and Biophysics, Karolinska Institutet, Stockholm, Sweden; <sup>6</sup>Oncogenic Signalling Laboratory, Telethon Kids Cancer Centre, Telethon Kids Institute, Nedlands, Australia; <sup>7</sup>University of Western Australia, Crawley, Australia; <sup>8</sup>Department of Medicine, University of Melbourne, Melbourne, Australia.

\* Equal contribution

**Table S1: Comparison of percentage of positive cells between tumor and normal tissues**

|              | VEGF-B expression (2H10) |                         |
|--------------|--------------------------|-------------------------|
|              | Tumor                    | Normal                  |
| Brain        | 0 – 50%<br>(+/++; 73%)   | -ve (0%)                |
| Breast       | 5 – >75%<br>(+/++; 64%)  | 25 – 50%<br>(+/++; 66%) |
| Bowel, large | 0 – >75%<br>(+/++; 59%)  | 0 – 50%<br>(+/++; 83%)  |
| Kidney       | 25 – >75%<br>(+/++; 21%) | 25 – 50%<br>(+/++; 83%) |
| Liver        | 5 – 75%<br>(+/+++; 88%)  | 5 – 75%<br>(+/++; 50%)  |
| Lung         | 5 – >75%<br>(+/++; 53%)  | 0 – 50%<br>(+; 86%)     |

Key: % of positive cells (intensity of staining; proportion of positive tissues expressed as percentage)

**Table S2: Summary of VEGF-B and VEGFR1 protein expression in human normal tissues**

| Normal Tissue    | Anti-VEGF-B 2H10 | Anti-VEGF-B MAB751 | Results                                             | Anti-VEGFR1 | Results                                                   |
|------------------|------------------|--------------------|-----------------------------------------------------|-------------|-----------------------------------------------------------|
| Adrenal Gland    | 6/11             | 8/11               | + to ++ cortex, medulla; +ve vessels                | 9/10        | + to +++ cortex, medulla; +ve vessels                     |
| Bladder, urinary | 11/11            | 11/11              | + to ++ epith; +ve vessels; -ve stroma              | 11/11       | + to +++ epithelium; +ve vessels; occ stroma              |
| Brain            | 0/12             | 4/13               | -ve (or occ +ve) parenchyma; occ +ve vessels        | 12/12       | ++ parenchyma; occ. vessels                               |
| Bowel, Large     | 10/12            | 12/12              | + to ++ mucosal epith; weak vessels                 | 12/12       | + to ++ mucosal epith and lamina propia; occ vessels      |
| Breast           | 4/6              | 6/7                | + to ++ ducts; occ. stromal and vessels             | 9/9         | + to ++ duct epith; +ve vessels and occ stroma            |
| Brown adipose    | 6/6              | 6/6                | + fat; +ve vessels (sm muscle and perivasc)         | 6/6         | ++ brown fat; +ve vessels                                 |
| Heart            | 9/11             | 11/11              | + to ++ cardiac muscle; -ve vessels                 | 11/11       | + to +++ cardiac muscle; +ve vessels                      |
| Kidney           | 10/12            | 10/10              | + to ++ tubules; -ve glomeruli and occ. vessels     | 10/10       | + to +++ tubules; occ vessels; -ve glomeruli              |
| Liver            | 6/12             | 8/11               | + to ++ hepatocytes and ducts; -ve vessels & stroma | 12/12       | ++ to +++ hepatocytes & ducts; occ vessels                |
| Lung             | 12/14            | 12/14              | + Type I pneumocytes, occ. Type II; +ve vessels     | 14/14       | + Type I pneumocytes, occ. Type II; +ve vessels           |
| Pancreas         | 11/11            | 11/11              | + to +++ ducts & islets; occ vess; - ve stroma      | 11/11       | + to +++ ducts, islets and acini; -ve vessels; occ stroma |
| Placenta         | 6/6              | 6/6                | + to ++ trophoblasts; +ve vess                      | 6/6         | + to ++ trophoblasts; focal vessels                       |
| Prostate, BPH    | 9/12             | 11/12              | + to ++ glands; occ vess; - ve stroma               | 12/12       | + to +++ gland epith; +ve stroma and focal vessels        |
| Skeletal Muscle  | 4/4              | 4/4                | + muscle; occ vessels                               | 4/4         | ++ muscle and vessels                                     |
| Spleen           | 11/11            | 11/11              | +ve red and white pulp; +ve vess                    | 11/11       | +ve red and white pulp, more widespread in red pulp       |
| Thyroid          | 9/11             | 10/11              | + to +++ foll epith; occ vess                       | 8/10        | + to ++ foll epith                                        |
| Tonsil           | 8/12             | 9/11               | -ve lymphocytes +ve vessels                         | 6/11        | + to ++ lymphocytes and vessels                           |
| Uterus           | 2/3              | 3/3                | + to ++ glands; -ve vess                            | 2/2         | + to +++ gland epith; -ve stroma and vessels              |

**Table S3: Summary of VEGF-B and VEGFR1 protein expression in human tumor tissues**

| <b>Tumor Tissue</b>       | <b>Anti-VEGF-B<br/>2H10</b> | <b>Anti-VEGF-B<br/>MAB751</b> | <b>Results</b>                       | <b>Anti-VEGFR1</b> | <b>Results</b>                           |
|---------------------------|-----------------------------|-------------------------------|--------------------------------------|--------------------|------------------------------------------|
| Brain GBM                 | 8/10                        | 10/10                         | + to ++ tum; occ vessels             | 10/10              | + to ++ tum; -ve vessels                 |
| Breast IDC                | 8/11                        | 9/11                          | + to ++ tum; -ve vessels and stroma  | 7/11               | + to ++ tum; occ vessels, +ve stroma     |
| Breast ILC                | 9/14                        | 14/14*                        | + to +++ tum; occ vessels            | 14/14              | + to ++ tum; occ vessels and stroma      |
| Colorectal Adenocarcinoma | 15/15                       | 15/15                         | + to ++ tum; -ve vessels and stroma  | 15/15              | + to +++ tum; occ vessels and stroma     |
| Kidney RCC                | 16/27                       | 26/27*                        | + to ++ tum; occ. vessels and stroma | 27/28              | + to ++ tum; occ vessels                 |
| Liver HCC                 | 5/24                        | 13/24                         | + to ++ tum; -ve vessels             | 24/24              | ++ to +++ tum; -ve vessels               |
| Lung Adenocarcinoma       | 14/16                       | 16/16                         | + to ++ tum; -ve vessels and stroma  | 16/16              | ++ to +++ tum; occ vessels and stroma    |
| Lung SqCC                 | 8/13                        | 11/13*                        | + to ++ tum; occ. vessels and stroma | 12/12              | + to +++ tum; occ vessels, +ve stroma    |
| Mesothelioma              | 9/19                        | 14/19                         | + tum; -ve vessels and stroma        | 17/17              | + to +++ tum; -ve vessels and occ stroma |
| Metastatic Melanoma       | 4/13                        | 13/13*                        | + to ++ tum; -ve vessels and stroma  | 13/13              | + to +++ tum; occ vessels, focal stroma  |
| Ovarian Adenocarcinoma    | 11/15                       | 12/15                         | tumor; occ. vessels and stroma       | 15/15              | + to +++ tumor; occ. vessels and stroma  |
| Pancreatic Adenocarcinoma | 6/8                         | 6/8                           | + to ++ tum; occ. vessels and stroma | 5/8                | + to +++ tum; focal vessels, occ stroma  |
| Prostate Adenocarcinoma   | 9/9                         | 9/9                           | + to ++ tum; occ vessels             | 9/9                | + to +++ tum; focal vessels and stroma   |
| Uterine Adenocarcinoma    | 9/14                        | 12/14                         | + to ++ tum; -ve vessels and stroma  | 14/14              | + to +++ tum; -ve vessels and stroma     |

### Figure S1. Comparison of biodistribution of IgG1 and IgG2a versions of 2H10 in mice

A mixture of  $^{131}\text{I}$ -labeled murine 2H10 IgG1 and  $^{125}\text{I}$ -labeled murine 2H10 IgG2a antibodies was administered to non-tumor-bearing balb/c nude mice alone (Figure S1 A,B) or with 1.1 mg unlabeled 2H10 (murine IgG2a) as a cold competitor (Figure S1 C,D). Biodistribution was measured at 3 hours (Figure S1 A,C) and 24 hours (Figure S1 B,D).

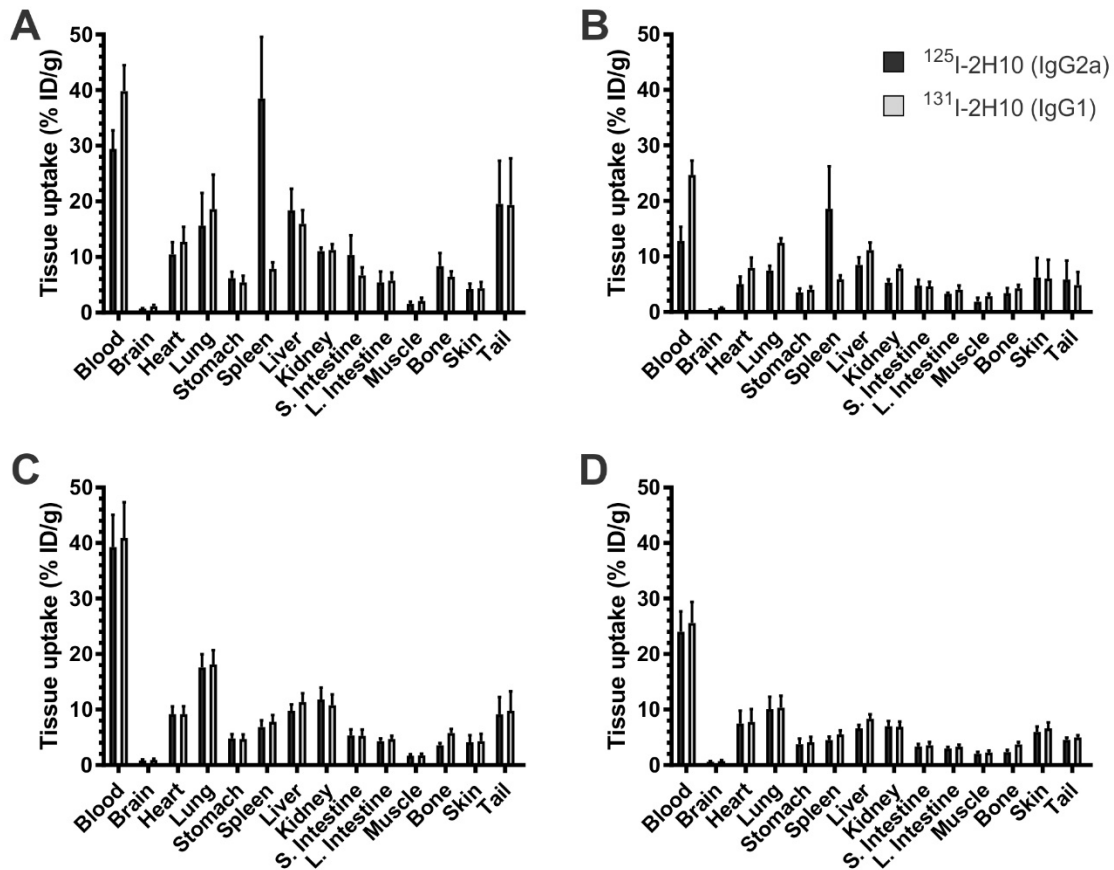

**Figure S2. Survival analysis of mice with Du4475 (A) or HT29 (B) xenografts treated with anti-VEGF antibodies.**

Graphs show survival of mice from experiments depicted in Figures 3 and 6, defined by reaching a set tumor volume threshold or ethical endpoint. Significant difference of curves was determined by Log-rank (Mantel-Cox test).

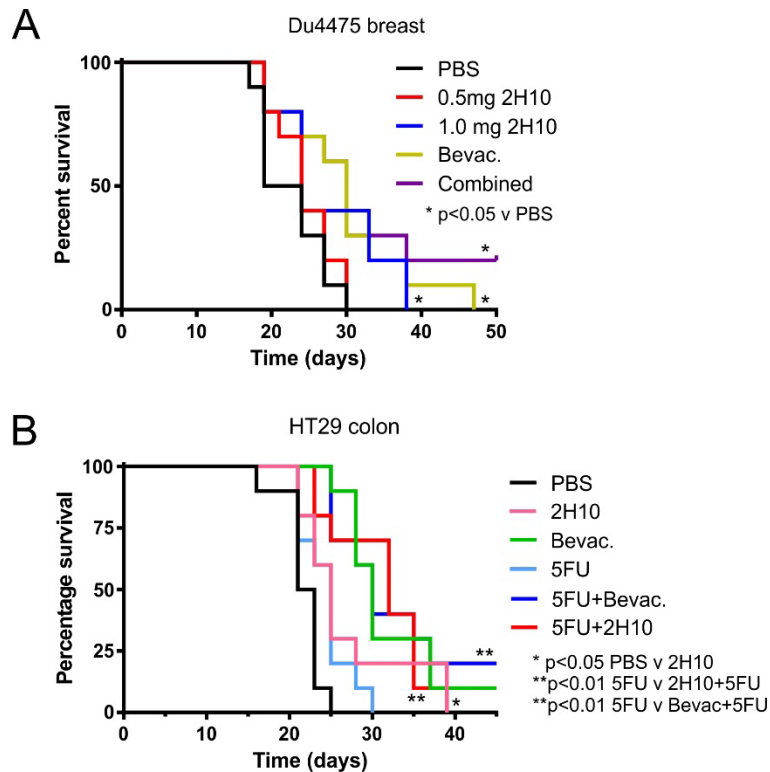

**Figure S3. Treatment of mice with MDA-MB-231 breast carcinoma xenografts.**

Mice bearing MDA-MB-231 tumors ( $n = 10$ ) were treated at the indicated doses of 2H10, alone (A) or in combination with 0.4mg bevacizumab (B). 2H10 treatment 3x/week, bevacizumab 2x/week (\* $p < 0.05$  compared to PBS vehicle control).

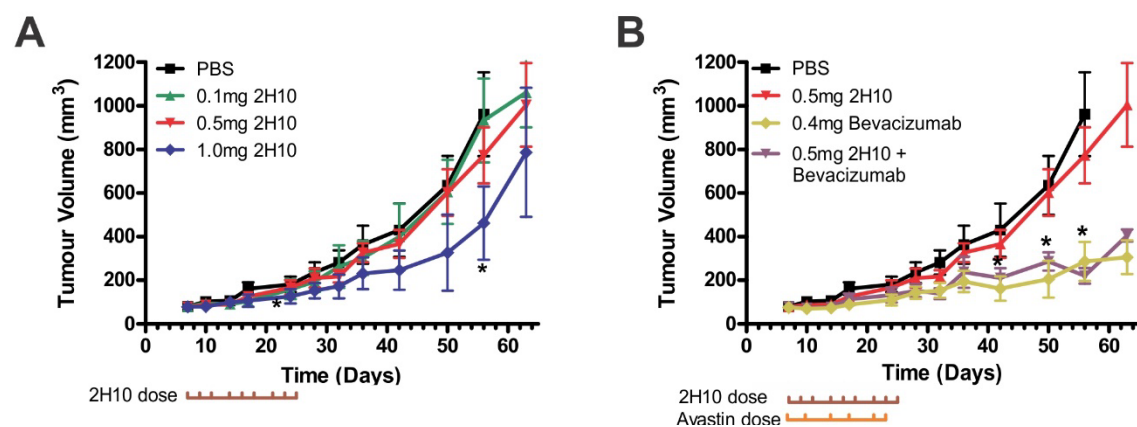

### Figure S4. Gene expression analysis of control and treated HT29 tumors.

Mice with HT29 tumors were treated with 2H10 versus vehicle control (n=4) for 2 weeks. Tumors were recovered and cDNA samples were prepared and screened using the Illumina Human HT-12 v4 and Mouse WG6v2 Expression Bead chip arrays containing over 43,000 gene probes (Australian Genome Research Facility). Heat maps show hierarchical clustering of samples by gene expression changes, with up- and down-regulated genes shown in red and blue, respectively. Enrichment of key pathways are listed below.

#### A. Human (tumor) gene expression changes, 2H10 (II) v PBS.

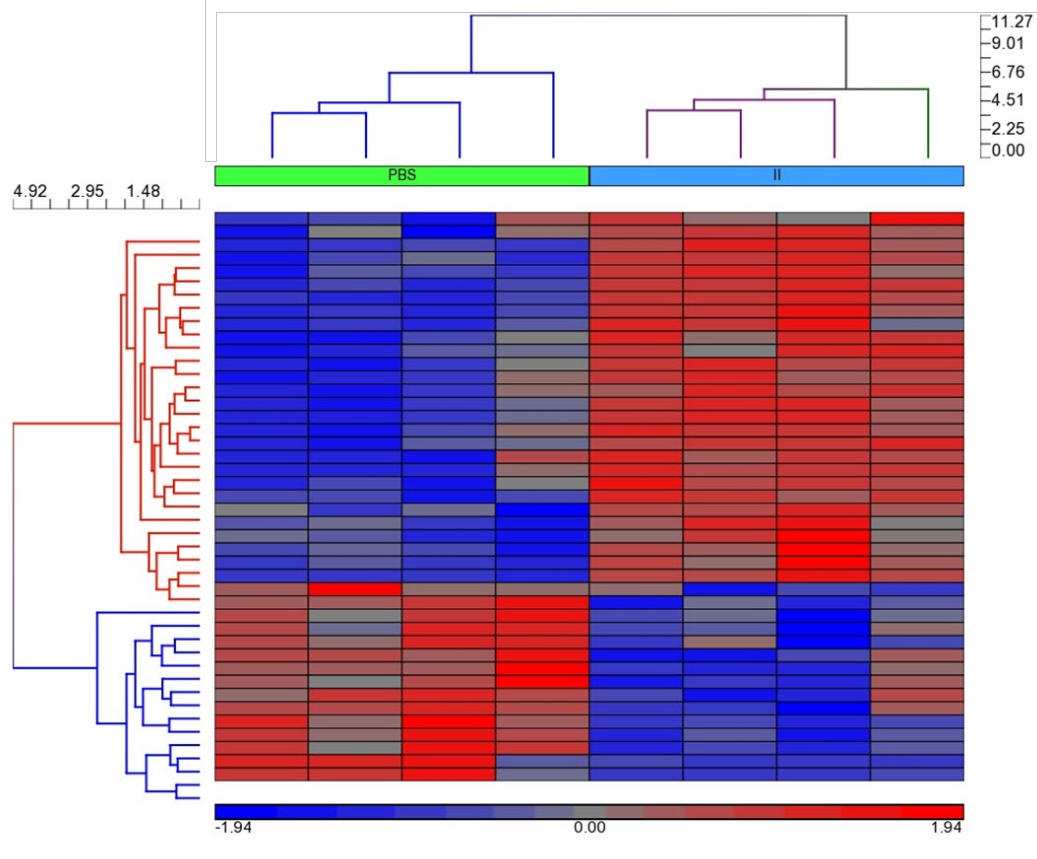

| Pathway Name                    | Enrichment Score | Enrichment p-value |
|---------------------------------|------------------|--------------------|
| Citrate cycle (TCA cycle)       | 5.999            | 0.002              |
| Lysine degradation              | 5.032            | 0.007              |
| Arginine and proline metabolism | 4.738            | 0.009              |
| Sulfur metabolism               | 3.361            | 0.035              |
| Lysosome                        | 3.302            | 0.037              |
| Metabolic pathways              | 2.887            | 0.056              |

**B. Mouse (stroma) gene expression changes, 2H10 (II) v PBS.**

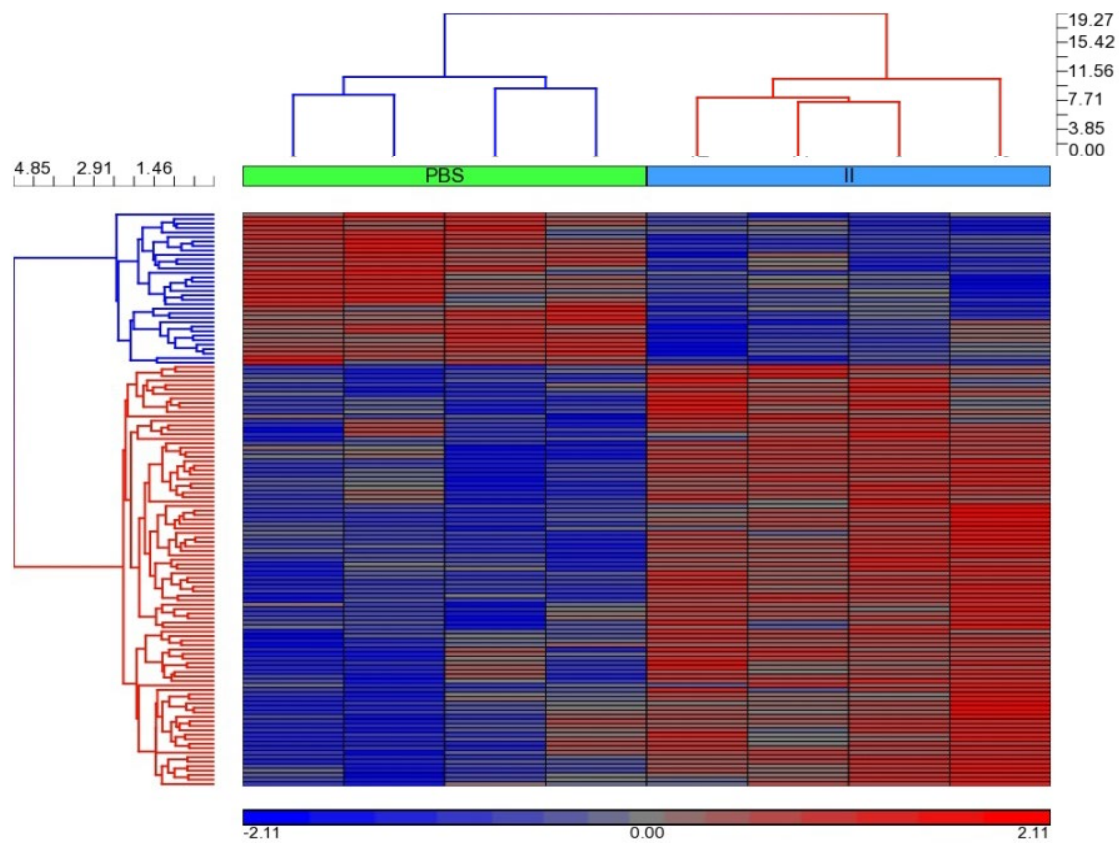

| Pathway Name                                          | Enrichment Score | Enrichment p-value |
|-------------------------------------------------------|------------------|--------------------|
| Regulation of actin cytoskeleton                      | 5.896            | 0.003              |
| Fc gamma R-mediated phagocytosis                      | 5.849            | 0.003              |
| HIF-1 signaling pathway                               | 5.255            | 0.005              |
| Pancreatic cancer                                     | 4.720            | 0.009              |
| Glycosylphosphatidylinositol(GPI)-anchor biosynthesis | 4.582            | 0.010              |
| Bacterial invasion of epithelial cells                | 4.554            | 0.011              |
| Focal adhesion                                        | 4.532            | 0.011              |
| Arrhythmogenic right ventricular cardiomyopathy       | 4.437            | 0.012              |
| Viral carcinogenesis                                  | 4.188            | 0.015              |
| Base excision repair                                  | 3.832            | 0.022              |
| Natural killer cell mediated cytotoxicity             | 3.031            | 0.048              |
